# Supplementary material for: Transforming surface-modified metal organic framework powder into room temperature porous liquidsviaan electrical balance strategy
Source: Royal Society of Chemistry journal article supplement (doi:10.1039/d0nj02388d), 2020-01-01
Supplement: d0nj02388d1.pdf [file d0nj02388d1.pdf]

## Electronic Supplementary Information

### Transforming Surface-modified Metal Organic Framework Powder into Room Temperature Porous Liquids via an Electrical Balance Strategy

*Xiaoran Zhao,<sup>‡</sup> Shuhao An,<sup>‡</sup> Jialing Dai, Changjun Peng\*, Jun Hu\*, Honglai Liu\**

Key Laboratory for Advanced Materials and School of Chemistry and Molecular Engineering, East  
China University of Science and Technology, Shanghai 200237, China

<sup>‡</sup> These authors contributed equally.

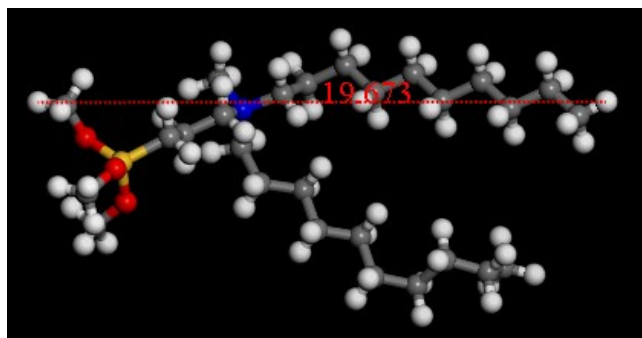

**Figure S1.** View of optimized molecular conformation of OS calculated at the B3LYP/6-31+G(d, p) level.

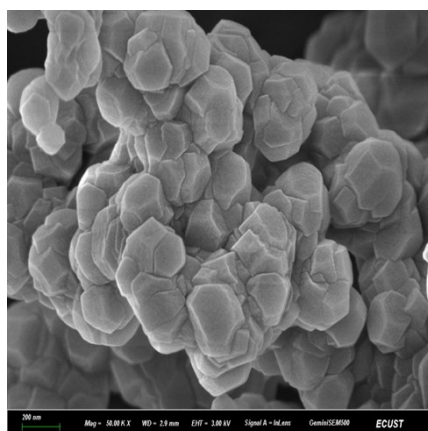

**Figure S2.** SEM image of pristine UiO-66.
